# Supplementary material
Source: publisher figshare collection journal article supplement (https://sage.figshare.com/ndownloader/files/13986689)
Supplement: Supplementary file 1 [file 13986689]

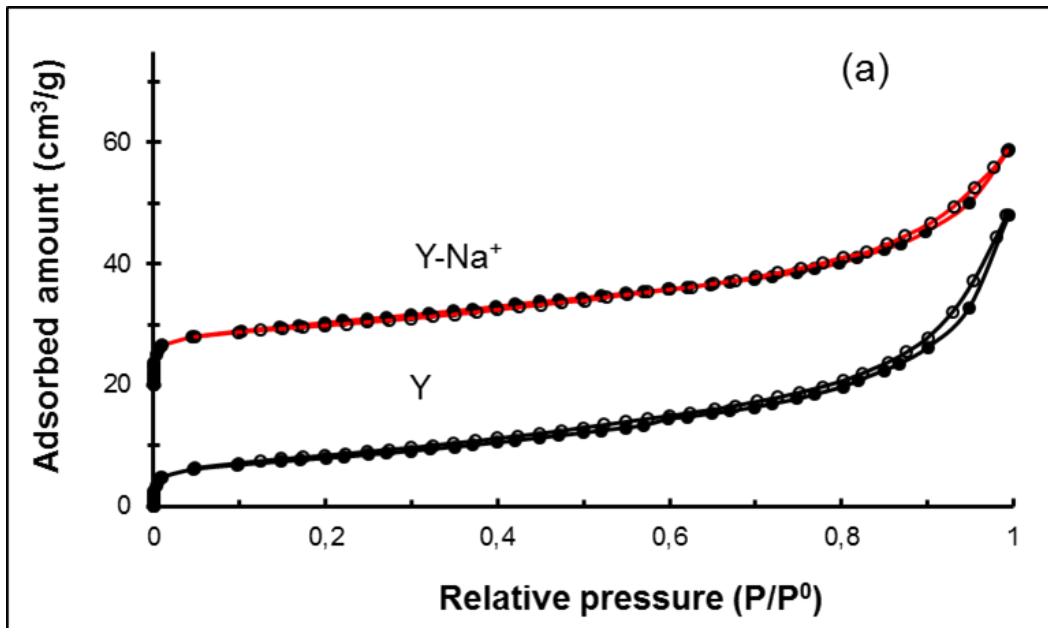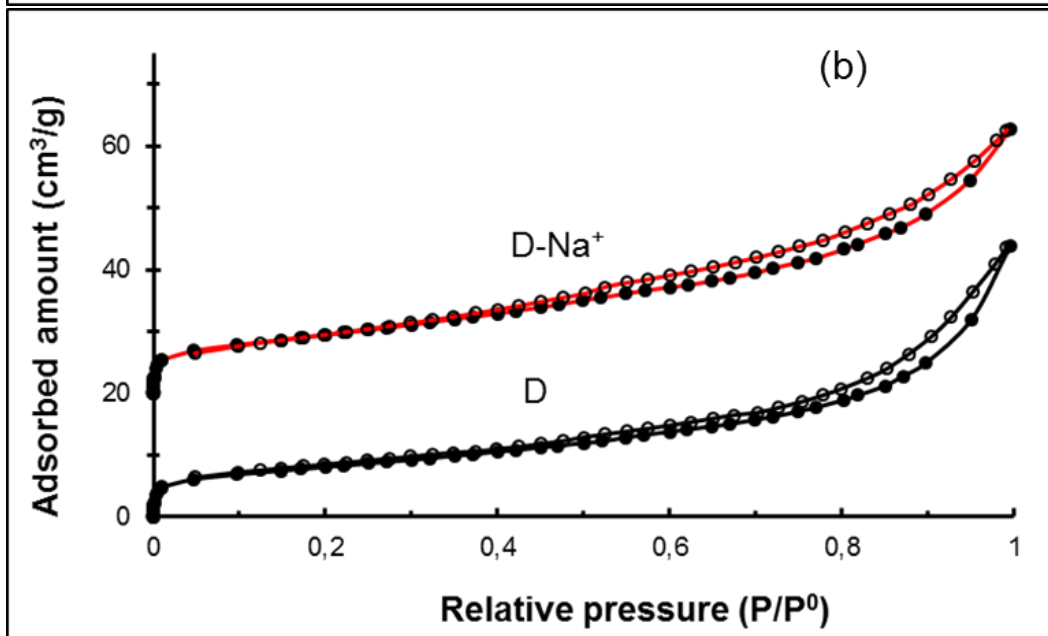

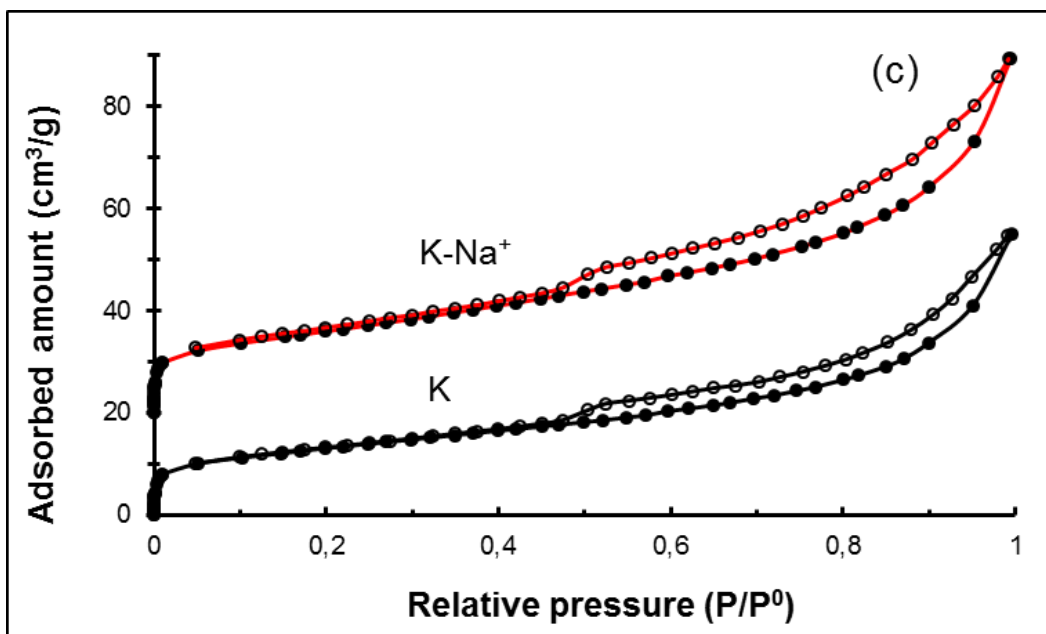

**Supplemental Material Figure 1.** N<sub>2</sub> adsorption–desorption isotherms of (a) Y-Na<sup>+</sup> and Y, (b) D-Na<sup>+</sup> and D, (c) K-Na<sup>+</sup> and K.

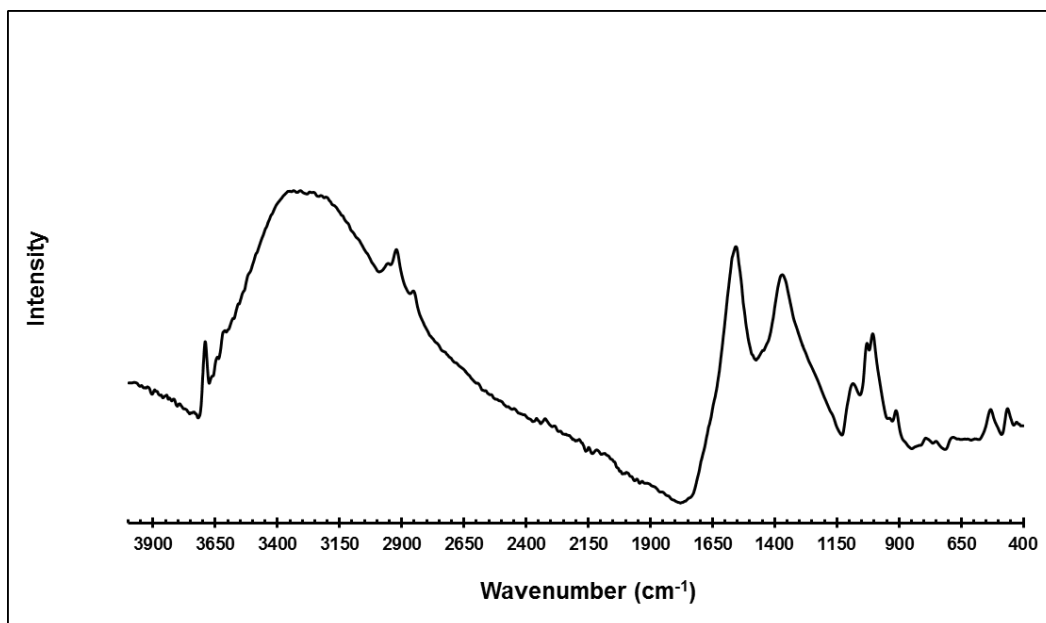

**Supplemental Material Figure 2.** IR spectrum of humic acid using the ATR technique
